# Supplementary material for: The identification of Oligo-Miocene mammalian palaeocommunities from the Riversleigh World Heritage Area, Australia and an appraisal of palaeoecological techniques
Source: PeerJ. 2017 Jun 30;5:e3511. doi: 10.7717/peerj.3511 (PMC5494167; doi:10.7717/peerj.3511)
Supplement: Supplemental Information 1 [file peerj-05-3511-s001.xlsx]

## Sheet: Sheet1
Superfamily	LM	NG	COA	WW	WH	KCB	UP	HI	RING	GAG	HH	MM	CS	ENC
Burramyoidea	28	14	6	20	3	4	154	0	7	16	3	0	10	1
Dasyuromorphia incertae sedis	11	20	4	31	22	2	43	2	8	17	38	1	10	4
Diprotodontoidea	3	8	79	11	11	7	4	9	0	8	44	17	23	3
Macropodoidea	23	95	56	500	175	142	683	2	5	58	201	152	261	30
Marsupialia cohort incertae sedis	0	0	0	0	0	0	1	0	0	0	0	0	0	1
Monotremata incertae sedis	0	4	0	0	0	0	0	0	19	0	0	0	0	0
Notoryctemorphia incertae sedis	0	11	0	70	0	0	135	0	1	0	0	1	5	0
Peramelemorphia incertae sedis	221	53	2	155	73	480	7144	0	112	177	923	15	973	30
Petauroidea	8	33	9	58	10	25	116	0	29	26	54	4	25	4
Phalangerida superfamily incertae sedis	1	6	0	1	0	0	1	0	0	1	3	0	3	0
Phalangeroidea	12	12	1	31	0	7	86	1	1	25	81	11	9	1
Phascolarctomorphia incertae sedis	0	18	0	1	0	0	5	0	0	1	4	0	7	1
Tarsipedoidea	3	34	0	12	1	0	58	0	2	3	5	1	2	0
Vombatoidea	0	0	11	0	0	0	3	1	0	0	0	0	1	26
Vombatomorphia incertae sedis	0	6	9	39	39	1	10	3	1	0	12	16	33	8
Yalkaparidontia incertae sedis	3	23	0	14	3	1	122	0	0	1	1	2	47	0
