# Supplementary material for: The identification of Oligo-Miocene mammalian palaeocommunities from the Riversleigh World Heritage Area, Australia and an appraisal of palaeoecological techniques
Source: PeerJ. 2017 Jun 30;5:e3511. doi: 10.7717/peerj.3511 (PMC5494167; doi:10.7717/peerj.3511)
Supplement: Supplemental Information 2 [file peerj-05-3511-s002.xlsx]

## Sheet: Sheet1
Family	LM	NG	COA	WW	WH	KCB	UP	HI	RING	GAG	HH	MM	CS	ENC
Acrobatidae	1	11	0	1	1	0	1	0	1	1	1	1	1	0
Balbaridae	0	6	20	25	7	7	9	1	0	3	6	1	40	0
Burramyidae	22	14	6	20	3	4	154	0	7	16	3	0	10	1
Dasyuridae	1	7	2	5	1	1	14	1	1	1	8	0	1	1
Dasyuromorphia family incertae sedis	0	0	0	0	0	0	0	0	0	1	0	0	0	2
Diprotodontidae	1	6	79	4	11	7	1	6	0	6	23	5	10	1
Ektopodontidae	0	3	0	1	0	0	1	0	0	0	0	0	0	0
Hypsiprymnodontidae	0	14	19	8	2	2	110	1	0	11	8	5	26	2
Ilariidae	0	0	0	0	14	0	0	0	0	0	0	0	0	0
Macropodidae	2	17	1	46	10	6	22	0	0	8	6	4	51	28
Maradidae	0	0	0	0	0	0	0	1	0	0	0	0	0	0
Marsupialia cohort incertae sedis	0	0	0	0	0	0	0	0	0	0	0	0	0	1
Mirilaniidae	0	4	0	3	0	0	1	0	0	0	0	0	0	0
Notoryctidae	0	11	0	70	0	0	135	0	1	0	0	1	5	0
Ornithorynchidae	0	4	0	0	0	0	0	0	19	0	0	0	0	0
Palorchestidae	0	1	0	4	0	0	0	0	0	1	2	0	3	2
Peramelemorphia family incertae sedis	6	40	2	64	6	1	130	0	6	26	9	8	111	29
Petauridae	0	8	0	2	1	1	3	0	1	2	1	2	1	1
Petauroidea family incertae sedis	0	0	0	6	0	0	1	0	0	0	1	1	1	0
Phalangeridae	4	2	1	2	0	2	2	1	1	8	14	3	6	1
Phascolarctidae	0	16	0	1	0	0	5	0	0	1	4	0	5	1
Pilkipildridae	1	1	0	1	0	0	1	0	0	1	1	0	1	0
Potoroidae	0	1	1	1	1	0	1	0	0	0	2	0	1	0
Pseudocheiridae	4	11	9	13	2	2	43	0	10	15	5	1	11	3
Thylacinidae	0	2	1	1	7	0	1	1	2	3	7	1	3	1
Thylacoleonidae	0	2	8	1	9	1	5	1	0	0	4	0	1	10
Vombatidae	0	0	5	0	0	0	1	1	0	0	0	0	1	26
Wynyardiidae	0	4	0	34	16	0	5	1	1	0	0	16	32	0
Yalkaparidontidae	3	23	0	14	3	1	122	0	0	1	1	2	47	0
Yaralidae	3	5	0	7	1	0	29	0	1	4	1	0	9	1
Yingabalanaridae	0	0	0	0	0	0	1	0	0	0	0	0	0	0
