# Supplementary material for: The identification of Oligo-Miocene mammalian palaeocommunities from the Riversleigh World Heritage Area, Australia and an appraisal of palaeoecological techniques
Source: PeerJ. 2017 Jun 30;5:e3511. doi: 10.7717/peerj.3511 (PMC5494167; doi:10.7717/peerj.3511)
Supplement: Supplemental Information 3 [file peerj-05-3511-s003.xlsx]

## Sheet: Sheet1
Genus	LM	NG	COA	WW	WH	KCB	UP	HI	RING	GAG	HH	MM	CS	ENC
Acrobatidae nov. gen. 1	0	10	0	0	0	0	1	0	0	0	0	0	0	0
Acrobatidae nov. gen. 2	0	1	0	0	0	0	0	0	0	0	0	0	0	0
Badjcinus	0	0	0	0	6	0	0	0	0	0	0	0	0	0
Balbaroo	0	6	20	25	1	7	4	1	0	3	6	1	40	0
Barinya	1	7	2	5	0	0	14	0	0	0	7	0	1	0
Bettongia	0	0	0	0	0	0	0	0	0	0	2	0	0	0
Bulungamaya	0	12	0	11	0	1	9	0	0	3	0	1	16	0
Bulungu	0	12	0	9	1	0	36	0	1	3	1	0	11	0
Burramys	21	14	6	19	3	4	153	0	7	15	3	0	10	1
Cercartetus	1	0	0	1	0	0	1	0	0	1	0	0	0	0
Chunia	0	2	0	0	0	0	1	0	0	0	0	0	0	0
Dasylurinja	0	0	0	0	0	0	0	0	0	0	1	0	0	0
Djaludjangi	0	0	0	6	0	0	1	0	0	0	1	1	1	0
Djilgaringa	1	0	0	0	0	0	1	0	0	1	0	0	0	0
Durudawiri	0	4	0	3	0	0	1	0	0	0	0	0	0	0
Ekaltadeta	0	12	11	8	2	1	32	1	0	8	8	1	17	2
Ektopodon	0	0	0	1	0	0	0	0	0	0	0	0	0	0
Ektopodontidae nov. gen.	0	1	0	0	0	0	0	0	0	0	0	0	0	0
Galadi	3	6	1	8	0	0	3	0	1	12	2	5	20	0
Ganawamaya	0	1	0	1	1	0	0	0	0	0	0	0	1	0
Ganbulanyi	0	0	0	0	0	0	0	0	0	0	0	0	0	1
Ganguroo	1	0	0	7	0	2	4	0	0	3	3	1	4	1
Gawinga	0	0	0	1	0	0	4	0	0	0	0	0	0	0
Gumardee	0	0	0	1	1	0	1	0	0	0	0	0	5	0
Hypsiprymnodon	0	2	8	0	0	1	78	0	0	3	0	4	9	0
Dalamana	0	0	0	0	0	0	0	0	0	1	0	0	0	0
Kuterintja	0	0	0	0	14	0	0	0	0	0	0	0	0	0
Litokoala	0	0	0	0	0	0	1	0	0	1	4	0	0	0
Madju	1	12	0	32	4	0	31	0	2	7	4	2	34	29
Malleodectes	0	0	0	0	0	0	0	0	0	0	0	0	0	1
Marada	0	0	0	0	0	0	0	1	0	0	0	0	0	0
Marlu	0	1	5	2	0	0	0	0	7	8	2	0	1	0
Maximucinus	0	0	0	0	0	0	0	0	1	0	0	0	0	0
Mayigriphus	0	0	0	0	0	0	0	0	0	0	0	0	0	2
Muribacinus	0	0	0	0	0	0	0	0	0	2	1	0	0	0
Nambaroo	0	3	0	6	4	0	5	0	0	0	0	0	1	0
Namilamadeta	0	4	0	34	16	0	5	1	1	0	0	16	32	0
Naraboryctes	0	11	0	70	0	0	135	0	1	0	0	1	5	0
Neohelos	0	6	76	4	1	7	0	0	0	3	7	5	10	1
Ngamalacinus	0	1	0	0	0	0	0	0	0	0	0	0	2	0
Ngapakaldia	0	0	0	0	0	0	0	0	0	0	0	0	1	0
Nimbacinus	0	0	0	0	1	0	0	0	1	0	6	0	0	0
Nimbadon	1	0	3	0	0	0	0	0	0	3	16	0	0	0
Nimiokoala	0	16	0	1	0	0	4	0	0	0	0	0	4	0
Nowidgee	0	0	0	4	3	1	1	0	0	0	0	0	7	0
Obdurodon	0	4	0	0	0	0	0	0	19	0	0	0	0	0
Onirocuscus	3	0	0	1	0	2	0	0	0	3	1	0	3	0
Paljara	1	7	3	8	0	1	36	0	0	4	0	0	7	1
Palorchestes	0	0	0	0	0	0	0	0	0	0	0	0	0	2
Peramelemorphia nov. gen. 1	1	9	1	14	1	0	59	0	1	1	1	1	46	0
Peramelemorphia nov. gen. 2	1	1	0	1	0	0	1	0	1	3	1	0	0	0
Petauridae nov. gen. 1	0	7	0	1	0	0	1	0	0	0	0	1	0	1
Petauridae nov. gen. 2	0	0	0	1	0	0	1	0	0	0	0	1	1	0
Petauridae nov. gen. 3	0	1	0	0	0	0	1	0	0	1	0	0	0	0
Phalangeridae nov. gen.	0	2	0	1	0	0	2	1	0	0	0	1	2	0
Phascolarctidae nov. gen.	0	0	0	0	0	0	0	0	0	0	0	0	0	1
Pildra	2	1	0	1	1	0	1	0	2	2	1	1	2	0
Priscakoala	0	0	0	0	0	0	0	0	0	0	0	0	1	0
Priscileo	0	0	2	1	8	0	1	0	0	0	0	0	1	0
Propalorchestes	0	1	0	4	0	0	0	0	0	1	2	0	2	0
Pseudocheiridae nov. gen.	1	2	1	1	1	1	2	0	1	1	2	0	1	2
Rhizophascolonus	0	0	4	0	0	0	0	0	0	0	0	0	0	0
Rhizosthenurus	0	0	0	0	0	0	0	0	0	0	0	0	0	25
Silvabestius	0	0	0	0	0	0	0	1	0	0	0	0	0	0
Thylacinus	0	1	0	0	0	0	0	0	0	1	0	1	0	1
Thylacoleonidae nov. gen.	0	1	0	0	0	0	0	0	0	0	0	0	0	0
Trichosurus	1	0	1	0	0	0	0	0	1	5	13	0	0	1
Vombatidae nov. gen.	0	0	1	0	0	0	1	0	0	0	0	0	1	0
Wabulacinus	0	0	0	0	0	0	0	1	0	0	0	0	1	0
Wabularoo	0	5	0	23	6	0	6	0	0	0	0	2	19	0
Wakaleo	0	1	6	0	1	1	4	1	0	0	4	0	0	10
Wakiewakie	0	0	0	0	0	0	1	0	0	0	0	0	0	0
Wanburoo	1	0	0	0	0	2	0	0	0	2	3	0	0	2
Warendja	0	0	0	0	0	0	0	0	0	0	0	0	0	26
Wururoo	0	0	1	4	1	0	0	0	0	0	0	0	3	0
Wyulda	0	0	0	0	0	0	0	0	0	0	0	2	1	0
Yalkaparidon	3	23	0	14	3	1	122	0	0	1	1	2	47	0
Yarala	3	5	0	7	1	0	29	0	1	4	1	0	9	1
Yingabalinara	0	0	0	0	0	0	1	0	0	0	0	0	0	0
